# Supplementary material
Source: PubMed Central journal article supplement (PMC4395773)
Supplement: mt2014235x1.pdf [file mt2014235x1.pdf]

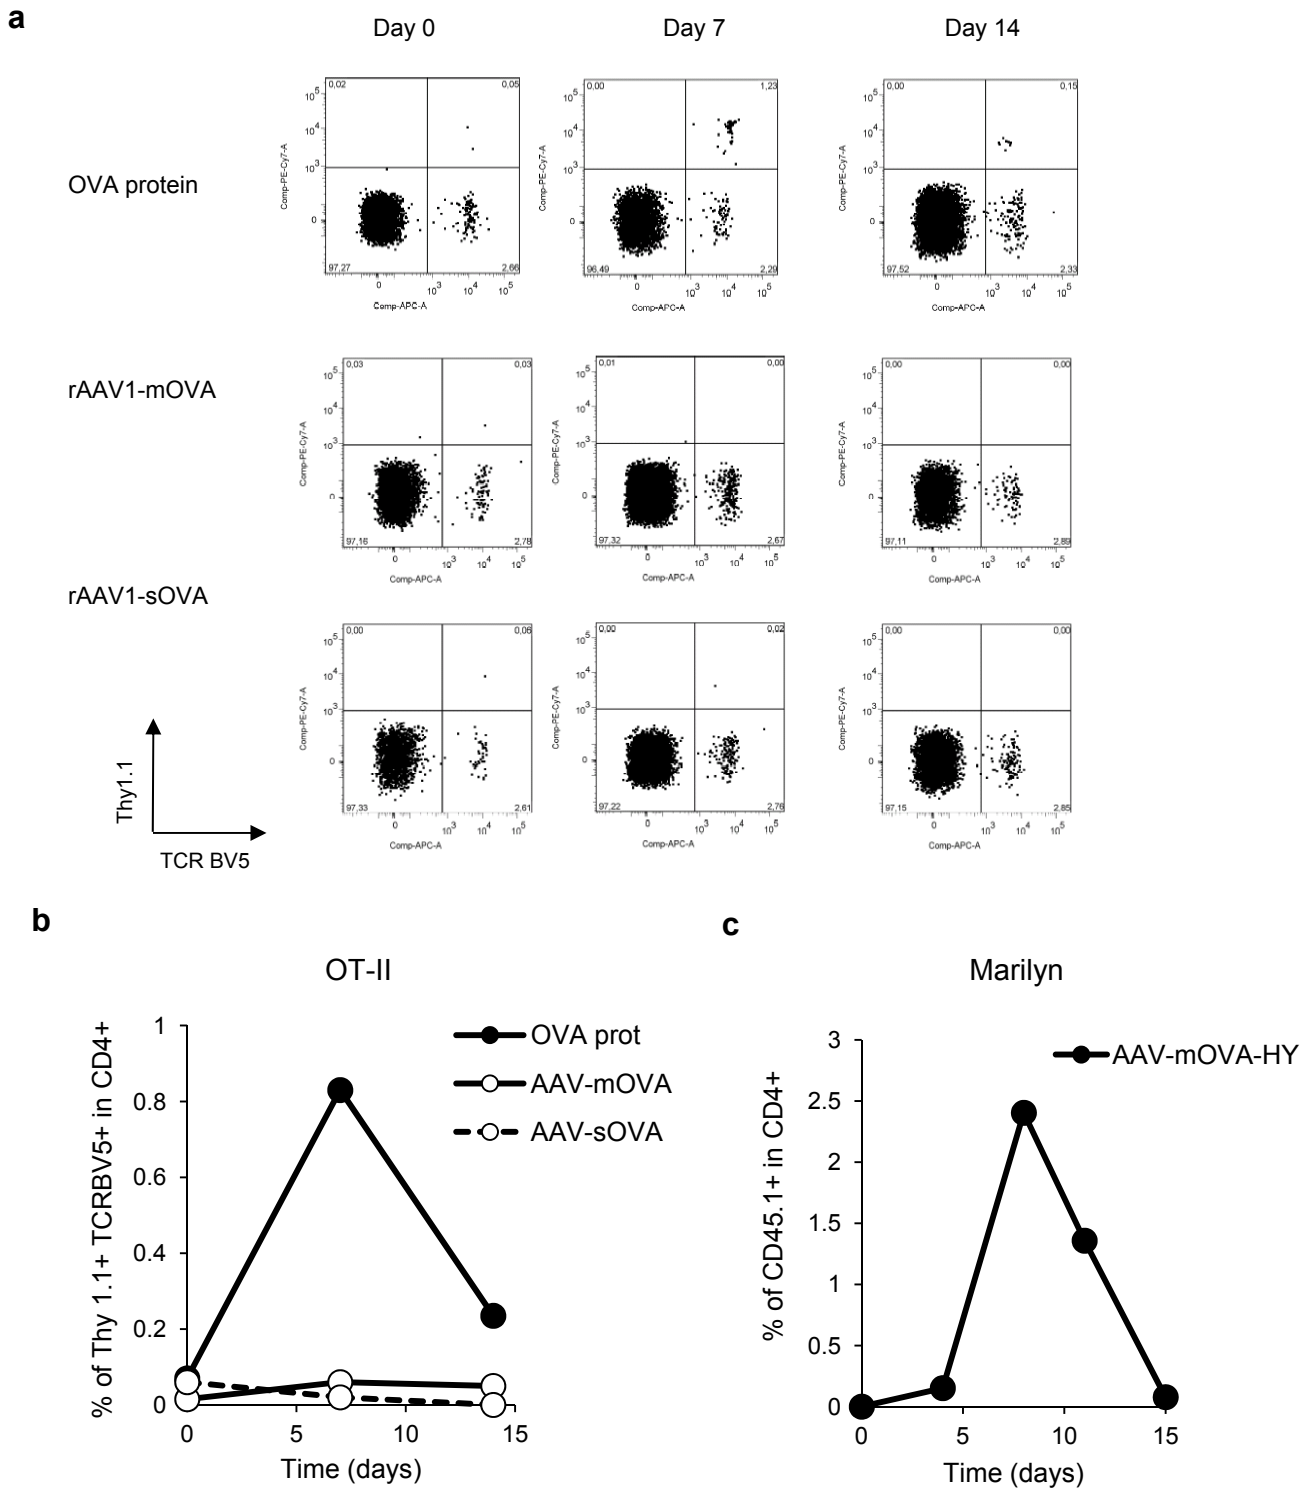

**Figure S1**

(a-b) C57Bl/6 female mice were transferred at day 0 with  $10^6$  congenic Thy1.1 TCR transgenic OT-II CD4<sup>+</sup> T cells and were simultaneously injected i.m. with rAAV1-mOVA, rAAV1-sOVA or injected s.c. with 100 $\mu$ g of OVA protein emulsified in IFA. On day 0, 7 and 14, their PBL were stained to assess OT-II T cells expansion by flow cytometry analysis. Dot plots representative of three and gated on CD4<sup>+</sup> 7-AAD<sup>-</sup> cells are shown. (c) Same experiment but with 2000 congenic CD45.1 TCR transgenic Marilyn CD4<sup>+</sup> T-cells transferred iv and mOVA-HY vector.
